# Supplementary material
Source: ML conference proceedings conference paper supplement (https://openreview.net/forum?id=5sV53leJCv)
Supplement: supplementary_material [file attachment]

---

# Module-wise Training of Neural Networks via the Minimizing Movement Scheme

---

Anonymous Author(s)

Affiliation

Address

email

## Abstract

1 Greedy layer-wise or module-wise training of neural networks is compelling in  
2 constrained and on-device settings where memory is limited, as it circumvents a  
3 number of problems of end-to-end back-propagation. However, it suffers from a  
4 stagnation problem, whereby early layers overfit and deeper layers stop increasing  
5 the test accuracy after a certain depth. We propose to solve this issue by introducing  
6 a module-wise regularization inspired by the minimizing movement scheme for  
7 gradient flows in distribution space. We call the method TRGL for Transport Regu-  
8 larized Greedy Learning and study it theoretically, proving that it leads to greedy  
9 modules that are regular and that progressively solve the task. Experimentally, we  
10 show improved accuracy of module-wise training of various architectures such as  
11 ResNets, Transformers and VGG, when our regularization is added, superior to  
12 that of other module-wise training methods and often to end-to-end training, with  
13 as much as 60% less memory usage.

## 14 1 Introduction

15 End-to-end backpropagation is the standard training method of neural networks. However, it requires  
16 storing the whole model and computational graph during training, which requires large memory  
17 consumption. It also prohibits training the layers in parallel. Dividing the network into modules,  
18 a module being made up of one or more layers, accompanied by auxiliary classifiers, and greedily  
19 solving module-wise optimization problems sequentially (i.e. one after the other fully) or in parallel  
20 (i.e. at the same time batch-wise), consumes much less memory than end-to-end training as it does  
21 not need to store as many activations, and when done sequentially, only requires loading and training  
22 one module (so possibly one layer) at a time. Module-wise training has therefore been used in  
23 constrained settings in which end-to-end training can be impossible such as training on mobile  
24 devices [51, 50] and dealing with very large whole slide images [59]. When combined with batch  
25 buffers, parallel module-wise training also allows for parallel training of the modules [6]. Despite its  
26 simplicity, module-wise training has been recently shown to scale well [6, 40, 53, 38], outperforming  
27 more complicated alternatives to end-to-end training such as synthetic [27, 11] and delayed [26, 25]  
28 gradients, while having superior memory savings.

29 In a classification task, module-wise training splits the network into successive modules, a module  
30 being made up of one or more layers. Each module takes as input the output of the previous module,  
31 and each module has an auxiliary classifier so that a local loss can be computed, with backpropagation  
32 happening only inside the modules and not between them (see Figure 1 below).

33 The main drawback of module-wise training is the well-documented *stagnation problem* observed in  
34 [36, 5, 53, 40], whereby early modules overfit and learn more discriminative features than end-to-end  
35 training, destroying task-relevant information, and deeper modules don't improve the test accuracy  
36 significantly, or even degrade it, which limits the deployment of module-wise training. We further

37 highlight this phenomenon in Figures 2 and 3 in Section 4.3. To tackle this issue, InfoPro [53] propose  
 38 to maximize the mutual information that each module keeps with the input, in addition to minimizing  
 39 the loss. [5] make the auxiliary classifier deeper and Sedona [40] make the first module deeper. These  
 40 last two methods lack a theoretical grounding, while InfoPro requires a second auxiliary network  
 41 for each module besides the classifier. We propose a different perspective, leveraging the analogy  
 42 between residual connections and the Euler scheme for ODEs [54]. To preserve input information,  
 43 we minimize the kinetic energy of the modules along with the training loss. Intuitively, this forces  
 44 the modules to change their input as little as possible. We leverage connections with the theories of  
 45 gradient flows in distribution space and optimal transport to analyze our method theoretically.

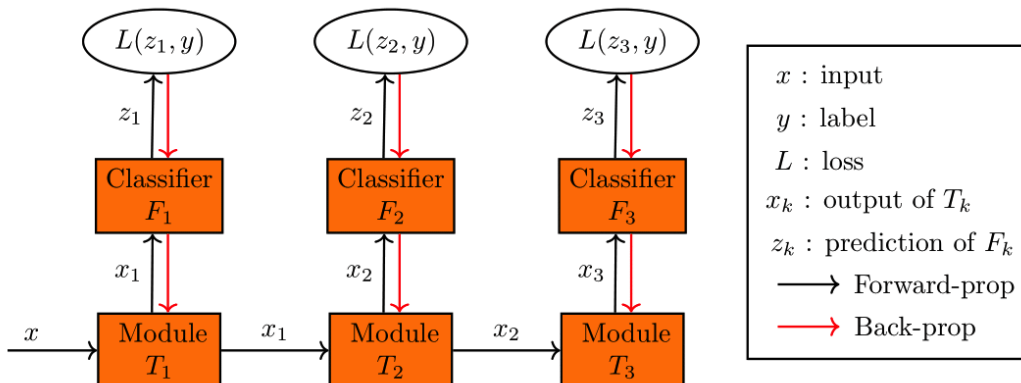

Figure 1: Module-wise training.

46 Our approach is particularly well-adapted to networks that use residual connections such as ResNets  
 47 [22, 23], their variants (e.g. ResNeXt [55], Wide ResNet [57], EfficientNet [49] and MobileNetV2  
 48 [41]) and vision transformers that are made up essentially of residual connections [32, 14], but is  
 49 immediately usable on any network where many layers have the same input and output dimension  
 50 such as VGG [45]. Our contributions are the following:

- 51 • We propose a new method for module-wise training. Being a regularization, it is lighter  
 52 than many recent state-of-the-art methods (PredSim [38], InfoPro [53]) that train another  
 53 auxiliary network besides the auxiliary classifier for each module.
- 54 • We theoretically justify our method, proving that it is a transport regularization that forces  
 55 the module to be an optimal transport map making it more regular and stable. We also show  
 56 that it amounts to a discretization of the gradient flow of the loss in probability space, which  
 57 means that the modules progressively minimize the loss and explains why the method avoids  
 58 the accuracy collapse observed in module-wise training.
- 59 • Experimentally, we consistently improve the test accuracy of module-wise trained networks  
 60 (ResNets, VGG and Swin-Transformer) beating 8 other methods, in sequential and parallel  
 61 module-wise training, and also in *multi-lap sequential* training, a variant of sequential  
 62 module-wise training that we introduce and that performs better in many cases. In particular,  
 63 our regularization makes parallel module-wise training superior or comparable in accuracy  
 64 to end-to-end training, while consuming 10% to 60% less memory.

## 65 2 Transport-regularized module-wise training

66 The typical setting of (sequential) module-wise training for minimizing a loss  $L$ , is, given a dataset  
 67  $\mathcal{D}$ , to solve one after the other, for  $1 \leq k \leq K$ , Problems

$$(T_k, F_k) \in \arg \min_{T, F} \sum_{x \in \mathcal{D}} L(F, T(G_{k-1}(x))) \quad (1)$$

68 where  $G_k = T_k \circ \dots \circ T_1$  for  $1 \leq k \leq K$ ,  $G_0 = \text{id}$ ,  $T_k$  is the module (one or many layers) and  $F_k$  is  
 69 an auxiliary classifier. Module  $T_k$  receives the output of module  $T_{k-1}$ , and auxiliary classifier  $F_k$

70 computes the prediction from the output of  $T_k$  so the loss can be computed. The features are  $x$  and  $L$   
71 has access to their label to calculate the loss (see Figure 1). The final network trained this way is  
72  $F_K \circ G_K$ . But, at inference, we can stop at any depth  $k$  and use  $F_k \circ G_k$  if it performs better. Indeed,  
73 an intermediate module often performs as well or better than the last module because of the early  
74 overfitting and subsequent stagnation or collapse problem of module-wise training [36, 5, 53, 40].

75 We propose below in (2) a regularization that avoids the destruction of task-relevant information  
76 by the early modules by forcing them to minimally modify their input. Proposition 2.2 proves  
77 that by using our regularization (2), we are indeed making the modules build upon each other to  
78 solve the task, which is the property we desire in module-wise training, as the modules now act as  
79 successive proximal optimization steps in the *minimizing movement scheme* optimization algorithm  
80 for maximizing the separability of the data representation. The background on optimal transport  
81 (OT), gradient flows and the minimizing movement scheme is in Appendices A and B.

## 82 2.1 Method statement

83 To keep greedily-trained modules from overfitting and destroying information needed later, we  
84 penalize their kinetic energy to force them to preserve the geometry of the problem as much as  
85 possible. If each module is a single residual block (that is a function  $T = \text{id} + r$ , which includes  
86 many transformer architectures [32, 14]), its kinetic energy is simply the squared norm of its residue  
87  $r = T - \text{id}$ , which we add to the loss  $L$  in the target of the greedy problems (1). All layers that have  
88 the same input and output dimension can be rewritten as residual blocks and the analysis applies to a  
89 large variety of architectures such as VGG [45]. Given  $\tau > 0$ , we now solve, for  $1 \leq k \leq K$ , Problems

$$(T_k^\tau, F_k^\tau) \in \arg \min_{T, F} \sum_{x \in \mathcal{D}} L(F, T(G_{k-1}^\tau(x))) + \frac{1}{2\tau} \|T(G_{k-1}^\tau(x)) - G_{k-1}^\tau(x)\|^2 \quad (2)$$

90 where  $G_k^\tau = T_k^\tau \circ \dots \circ T_1^\tau$  for  $1 \leq k \leq K$  and  $G_0^\tau = \text{id}$ . The final network is  $F_K^\tau \circ G_K^\tau$ . Intuitively, this biases  
91 the modules towards moving the points as little as possible, thus at least keeping the performance of  
92 the previous module. Residual connections are already biased towards small displacements and this  
93 bias is desirable and should be encouraged [28, 58, 21, 12, 29]. But the method can be applied to any  
94 module where  $T(x)$  and  $x$  have the same dimension so that  $T(x) - x$  can be computed.

95 To facilitate the theoretical analysis, we rewrite the method in a more general formulation using data  
96 distribution  $\rho$ , which can be discrete or continuous, and the distribution-wide loss  $\mathcal{L}$  that arises from  
97 the point-wise loss  $L$ . Then Problem (2) is equivalent to Problem

$$(T_k^\tau, F_k^\tau) \in \arg \min_{T, F} \mathcal{L}(F, T_\# \rho_k^\tau) + \frac{1}{2\tau} \int_{\Omega} \|T(x) - x\|^2 d\rho_k^\tau(x) \quad (3)$$

98 with  $\rho_{k+1}^\tau = (T_k^\tau)_\# \rho_k^\tau$  and  $\rho_1^\tau = \rho$ . So data embedding distributions  $\rho_k^\tau$  are pushed forward by maps  $T_k^\tau$ .

## 99 2.2 Link with the minimizing movement scheme

100 We now formulate our main result: solving Problems (3) is equivalent to following a *minimizing*  
101 *movement scheme (MMS)* [43] in distribution space for minimizing  $\mathcal{Z}(\mu) := \min_F \mathcal{L}(F, \mu)$ , which  
102 is the loss of the best classifier. If we are limited to linear classifiers,  $\mathcal{Z}(\rho_k^\tau)$  is the linear separability  
103 of the representation  $\rho_k^\tau$  at module  $k$  of the data distribution  $\rho$ . The MMS, introduced in [19, 18], is a  
104 metric counterpart to Euclidean gradient descent for minimizing functionals over distributions. In our  
105 case,  $\mathcal{Z}$  is the functional we want to minimize. We define the MMS below in Definition 2.1

106 The distribution space we work in is the metric Wasserstein space  $\mathbb{W}_2(\Omega) = (\mathcal{P}(\Omega), W_2)$ , where  
107  $\Omega \subset \mathbb{R}^d$  is a convex compact set,  $\mathcal{P}(\Omega)$  is the set of probability distributions over  $\Omega$  and  $W_2$  is the  
108 Wasserstein distance over  $\mathcal{P}(\Omega)$  derived from the optimal transport problem with Euclidean cost:

$$W_2^2(\alpha, \beta) = \min_{T \text{ s.t. } T_\# \alpha = \beta} \int_{\Omega} \|T(x) - x\|^2 d\alpha(x) \quad (4)$$

109 where we assume that  $\partial\Omega$  is negligible and that the distributions are absolutely continuous.

110 **Definition 2.1.** Given  $\mathcal{Z} : \mathbb{W}_2(\Omega) \rightarrow \mathbb{R}$ , and starting from  $\rho_1^\tau \in \mathcal{P}(\Omega)$ , the Minimizing Movement  
111 Scheme (MMS) takes proximal steps for minimizing  $\mathcal{Z}$ . It is given by

$$\rho_{k+1}^\tau \in \arg \min_{\rho \in \mathcal{P}(\Omega)} \mathcal{Z}(\rho) + \frac{1}{2\tau} W_2^2(\rho, \rho_k^\tau) \quad (5)$$

112 The MMS (5) can be seen as a non-Euclidean implicit Euler step for following the gradient flow of  
 113  $\mathcal{Z}$ , and  $\rho_k^\tau$  converges to a minimizer of  $\mathcal{Z}$  under some conditions (see the end of this section).

114 So under the mentioned assumptions on  $\Omega$  and absolute continuity of the distributions, we have that  
 115 Problems (3) are equivalent to the minimizing movement scheme (5):

116 **Proposition 2.2.** *The distributions  $\rho_{k+1}^\tau = (T_k^\tau)_\# \rho_k^\tau$ , where the functions  $T_k^\tau$  are found by solving  
 117 (3) and  $\rho_1^\tau = \rho$  is the data distribution, coincide with the MMS (5) for  $\mathcal{Z} = \min_F \mathcal{L}(F, \cdot)$ .*

118 *Proof.* The minimizing movement scheme (5) is equivalent to taking  $\rho_{k+1}^\tau = (T_k^\tau)_\# \rho_k^\tau$  where

$$T_k^\tau \in \arg \min_{T: \Omega \rightarrow \Omega} \mathcal{Z}(T_\# \rho_k^\tau) + \frac{1}{2\tau} W_2^2(T_\# \rho_k^\tau, \rho_k^\tau) \quad (6)$$

119 under conditions that guarantee the existence of a transport map between  $\rho_k^\tau$  and any other measure,  
 120 and absolute continuity of  $\rho_k^\tau$  suffices, and the loss can ensure that  $\rho_{k+1}^\tau$  is also absolutely continuous.  
 121 Among the functions  $T_k^\tau$  that solve problem (6), is the optimal transport map from  $\rho_k^\tau$  to  $\rho_{k+1}^\tau$ . To  
 122 solve specifically for this optimal transport map, we have to solve the equivalent Problem

$$T_k^\tau \in \arg \min_T \mathcal{Z}(T_\# \rho_k^\tau) + \frac{1}{2\tau} \int_\Omega \|T(x) - x\|^2 d\rho_k^\tau(x) \quad (7)$$

123 Problems (6) and (7) have the same minimum value, but the minimizer of (7) is now an optimal  
 124 transport map between  $\rho_k^\tau$  and  $\rho_{k+1}^\tau$ . This is immediate from the definition (4) of the  $W_2$  distance.  
 125 Equivalently minimizing first over  $F$  and then over  $T$  in (3), it follows from the definition of  $\mathcal{Z}$  that  
 126 Problems (3) and (7) are equivalent, which concludes.  $\square$

127 When solving over neural networks in practice, their representation power shown by universal  
 128 approximation theorems is important here to get close to equivalence between (5) and (6).

129 If  $\mathcal{Z}$  is lower-semi continuous then Problems (5) always admit a solution because  $\mathcal{P}(\Omega)$  is compact.  
 130 If  $\mathcal{Z}$  is also  $\lambda$ -geodesically convex for  $\lambda > 0$ , we have convergence of  $\rho_k^\tau$  as  $k \rightarrow \infty$  and  $\tau \rightarrow 0$  to  
 131 a minimizer of  $\mathcal{Z}$ , potentially under more technical conditions (see Appendix B). Even though a  
 132 machine learning loss will usually not satisfy these conditions, this analysis offers hints as to why  
 133 our method avoids in practice the problem of stagnation or collapse in performance of module-wise  
 134 training as  $k$  increases, as we are making proximal local steps in Wasserstein space to minimize the  
 135 loss. This convergence discussion also suggests taking  $\tau$  as small as possible and many modules.

### 136 2.3 Regularity result

137 As a secondary result, we show that Problem (3) has a solution and that the solution module  $T_k^\tau$  is an  
 138 optimal transport map between its input and output distributions, which means that it comes with  
 139 some regularity. [29] show that these networks generalize better and overfit less in practice. We  
 140 assume that the minimization in  $F$  is over a compact set  $\mathcal{F}$ , that  $\rho_k^\tau$  is absolutely continuous, that  $\mathcal{L}$  is  
 141 continuous and non-negative, that  $\Omega$  is convex and compact and that  $\partial\Omega$  is negligible.

142 **Proposition 2.3.** *Problem (3) has a minimizer  $(T_k^\tau, F_k^\tau)$  such that  $T_k^\tau$  is an optimal transport map.  
 143 And for any minimizer  $(T_k^\tau, F_k^\tau)$ ,  $T_k^\tau$  is an optimal transport map.*

144 The proof is in Appendix C. OT maps have regularity properties under some boundedness assumptions.  
 145 Given Theorem A.1 in Appendix A taken from [16],  $T_k^\tau$  is  $\eta$ -Hölder continuous almost everywhere  
 146 and if the optimization algorithm we use to solve the discretized problem (2) returns an approximate  
 147 solution pair  $(\tilde{F}_k^\tau, \tilde{T}_k^\tau)$  such that  $\tilde{T}_k^\tau$  is an  $\epsilon$ -optimal transport map, i.e.  $\|\tilde{T}_k^\tau - T_k^\tau\|_\infty \leq \epsilon$ , then we  
 148 have (using the triangle inequality) the following stability property of the module  $\tilde{T}_k^\tau$ :

$$\|\tilde{T}_k^\tau(x) - \tilde{T}_k^\tau(y)\| \leq 2\epsilon + C\|x - y\|^\eta \quad (8)$$

149 for almost every  $x, y \in \text{supp}(\rho_k^\tau)$  and  $C > 0$ . Composing these stability bounds on  $T_k^\tau$  and  $\tilde{T}_k^\tau$  allows  
 150 to get bounds for the composition networks  $G_k^\tau$  and  $\tilde{G}_k^\tau = \tilde{T}_k^\tau \circ \dots \circ \tilde{T}_1^\tau$ .

151 To summarize Section 2, the transport regularization makes each module more regular and it allows  
 152 the modules to build on each other as  $k$  increases to solve the task, which is the property we desire.

### 153 3 Practical implementation

#### 154 3.1 Multi-block modules

155 For simplicity, we presented in (2) the case where each module is a single residual block. However,  
 156 in practice, we often split the network into modules that are made-up of many residual blocks each.  
 157 We show here that regularizing the kinetic energy of such modules still amounts to a transport  
 158 regularization, which means that the theoretical results in Propositions 2.2 and 2.3 still apply.

159 If each module  $T_k$  is made up of  $M$  residual blocks, i.e. applies  $x_{m+1}=x_m+r_m(x_m)$  for  $0\leq m<M$ ,  
 160 then its total discrete kinetic energy for a single data point  $x_0$  is the sum of its squared residue norms  
 161  $\sum \|r_m(x_m)\|^2$ , since a residual network can be seen as a discrete Euler scheme for an ordinary  
 162 differential equation [54] with velocity field  $r$ :

$$x_{m+1} = x_m + r_m(x_m) \iff \partial_t x_t = r_t(x_t) \quad (9)$$

163 and  $\sum \|r_m(x_m)\|^2$  is then the discretization of the total kinetic energy  $\int_0^1 \|r_t(x)\|^2 dt$  of the ODE.  
 164 If  $\psi_m^x$  denotes the position of a point  $x$  after  $m$  residual blocks, then regularizing the kinetic energy  
 165 of multi-block modules now means solving

$$(T_k^\tau, F_k^\tau) \in \arg \min_{T, F} \sum_{x \in \mathcal{D}} (L(F, T(G_{k-1}^\tau(x))) + \frac{1}{2\tau} \sum_{m=0}^{M-1} \|r_m(\psi_m^x)\|^2) \quad (10)$$

s.t.  $T = (\text{id} + r_{M-1}) \circ \dots \circ (\text{id} + r_0)$ ,  $\psi_0^x = G_{k-1}^\tau(x)$ ,  $\psi_{m+1}^x = \psi_m^x + r_m(\psi_m^x)$

166 where  $G_k^\tau = T_k^\tau \circ \dots \circ T_1^\tau$  for  $1 \leq k \leq K$  and  $G_0^\tau = \text{id}$ . We also minimize this sum of squared residue norms  
 167 instead of  $\|T(x) - x\|^2$  (the two no longer coincide) as it works better in practice, which we assume  
 168 is because it offers a more localized control of the transport. As expressed in (9), a residual network  
 169 can be seen as an Euler scheme of an ODE and Problem (10) is then the discretization of

$$(T_k^\tau, F_k^\tau) \in \arg \min_{T, F} \mathcal{L}(F, T_{\#} \rho_k^\tau) + \frac{1}{2\tau} \int_0^1 \|v_t\|_{L^2((\phi_t)_{\#} \rho_k^\tau)}^2 dt \quad (11)$$

s.t.  $T = \phi_1$ ,  $\partial_t \phi_t^x = v_t(\phi_t^x)$ ,  $\phi_0 = \text{id}$

170 where  $\rho_{k+1}^\tau = (T_k^\tau)_{\#} \rho_k^\tau$  and  $r_m$  is the discretization of vector field  $v_t$  at time  $t = m/M$ . Here,  
 171 distributions  $\rho_k^\tau$  are pushed forward through the maps  $T_k^\tau$  which correspond to the flow  $\phi$  at time  
 172  $t = 1$  of the kinetically-regularized velocity field  $v_t$ . We recognize in the second term in the target of  
 173 (11) the optimal transport problem in its dynamic formulation (15) from [7], and given the equivalence  
 174 between the Monge OT problem (4) and the dynamic OT problem (15) in Appendix A, Problem (11)  
 175 is in fact equivalent to the original continuous formulation (3), and the theoretical results in Section 2  
 176 follow immediately (see also the proof of Proposition 2.3 in Appendix C).

#### 177 3.2 Solving the module-wise problems

178 The module-wise problems can be solved in two ways. One can completely train each module with its  
 179 auxiliary classifier for  $N$  epochs before training the next module, which receives as input the output  
 180 of the previous trained module. We call this *sequential* module-wise training. But we can also do this  
 181 batch-wise, i.e. do a complete forward pass on each batch but without a full backward pass, rather a  
 182 backward pass that only updates the current module  $T_k^\tau$  and its auxiliary classifier  $F_k^\tau$ , meaning that  
 183  $T_k^\tau$  forwards its output to  $T_{k+1}^\tau$  immediately after it computes it. We call this *parallel* module-wise  
 184 training. It is called *decoupled* greedy training in [6], which shows that combining it with batch  
 185 buffers solves all three locking problems and allows a linear training parallelization in the depth of the  
 186 network. We propose a variant of sequential module-wise training that we call *multi-lap sequential*  
 187 module-wise training, in which instead of training each module for  $N$  epochs, we train each module  
 188 from the first to the last sequentially for  $N/R$  epochs, then go back and train from the first module to  
 189 the last for  $N/R$  epochs again, and we do this for  $R$  laps. For the same total number of epochs and  
 190 training time, and the same advantages (loading and training one module at a time) this provides a  
 191 non-negligible improvement in accuracy over normal sequential module-wise training in most cases,  
 192 as shown in Section 4. Despite our theoretical framework being that of sequential module-wise  
 193 training, our method improves the test accuracy of all three module-wise training regimes.

194 **3.3 Varying the regularization weight**

195 The discussion in Section 2.2 suggests taking a fixed weight  $\tau$  for the transport cost that is as small as  
 196 possible. However, instead of using a fixed  $\tau$ , we might want to vary it along the depth  $k$  to further  
 197 constrain with a smaller  $\tau_k$  the earlier modules to avoid that they overfit or the later modules to  
 198 maintain the accuracy of earlier modules. We might also want to regularize the network further in  
 199 earlier epochs when the data is more entangled. We propose in Appendix D to formalize this varying  
 200 weight  $\tau_{k,i}$  across modules  $k$  and SGD iterations  $i$  by using a scheme inspired by the method of  
 201 multipliers to solve Problems (2) and (10). However, it works best in only one experiment in practice.  
 202 The observed dynamics of  $\tau_{k,i}$  suggest simply finding a fixed value of  $\tau$  that is multiplied by 2 for  
 203 the second half of the network, which works best in all the other experiments (see Appendix E).

204 **4 Experiments**

205 We call our method TRGL for Transport-Regularized Greedy Learning. For the auxiliary classifiers,  
 206 we use the architecture from DGL [5, 6], that is a convolution followed by an average pooling and  
 207 a fully connected layer, which is very similar to that used by InfoPro [53], except for the Swin  
 208 Transformer where we use a linear layer. We call vanilla greedy module-wise training with the  
 209 same architecture but without our regularization VanGL, and we include its results in all tables for  
 210 ablation study purposes. The code is available at [github.com/block-wise/module-wise](https://github.com/block-wise/module-wise) and  
 211 implementation details are in Appendix E.

212 **4.1 Parallel module-wise training**

213 To compare with other methods, we focus first on parallel training, as it performs better than sequential  
 214 training and has been more explored recently. The first experiment is training in parallel 3 residual  
 215 architectures and a VGG-19 [45] divided into 4 modules of equal depth on TinyImageNet. We  
 216 compare in Table 1 our results in this setup to three of the best recent parallel module-wise training  
 217 methods: DGL [6], PredSim [38] and Sedona [40], from Table 2 in [40]. We find that our TRGL has  
 218 a much better test accuracy than the three other methods, especially on the smaller architectures. It  
 219 also performs better than end-to-end training on the three ResNets. Parallel TRGL in this case with 4  
 220 modules consumes 10 to 21% less memory than end-to-end training (with a batch size of 256).

Table 1: Test accuracy of parallel TRGL with 4 modules (average and 95% confidence interval over 5 runs) on TinyImageNet, compared to DGL, PredSim, Sedona and E2E from Table 2 in [40], with memory saved compared to E2E as a percentage of E2E memory consumption in red.

| Architecture | Parallel VanGL       | Parallel TRGL (ours)        | PredSim | DGL   | Sedona | E2E   |
|--------------|----------------------|-----------------------------|---------|-------|--------|-------|
| VGG-19       | 56.17 ± 0.29 (↓ 27%) | <b>57.28</b> ± 0.20 (↓ 21%) | 44.70   | 51.40 | 56.56  | 58.74 |
| ResNet-50    | 58.43 ± 0.45 (↓ 26%) | <b>60.30</b> ± 0.58 (↓ 20%) | 47.48   | 53.96 | 54.40  | 58.10 |
| ResNet-101   | 63.64 ± 0.30 (↓ 24%) | <b>63.71</b> ± 0.40 (↓ 11%) | 53.92   | 53.80 | 59.12  | 62.01 |
| ResNet-152   | 63.87 ± 0.16 (↓ 21%) | <b>64.23</b> ± 0.14 (↓ 10%) | 51.76   | 57.64 | 64.10  | 62.32 |

221 The second experiment is training in parallel two ResNets divided into 2 modules on CIFAR100  
 222 [30]. We compare in Table 2 our results in this setup to the two delayed gradient methods DDG [26]  
 223 and FR [25] from Table 2 in [25]. Here again, parallel TRGL has a better accuracy than the other  
 224 two methods and than end-to-end training. With only two modules, the memory gains from less  
 225 backpropagation are neutralized by the weight of the extra classifier and there are negligible memory  
 226 savings compared to end-to-end training. However, parallel TRGL has a better test accuracy by up to  
 227 almost 2 percentage points.

Table 2: Test accuracy of parallel TRGL with 2 modules (average and 95% confidence interval over 3 runs) on CIFAR100, compared to DDG, FR and E2E from Table 2 in [25].

| Architecture | Parallel VanGL | Parallel TRGL (ours) | DDG   | FR    | E2E   |
|--------------|----------------|----------------------|-------|-------|-------|
| ResNet-101   | 77.31 ± 0.27   | <b>77.87</b> ± 0.44  | 75.75 | 76.90 | 76.52 |
| ResNet-152   | 75.40 ± 0.75   | <b>76.55</b> ± 1.90  | 73.61 | 76.39 | 74.80 |

228 The third experiment is training in parallel a ResNet-110 divided into two, four, eight and sixteen  
 229 modules on STL10 [10]. We compare in Table 3 our results in this setup to the recent methods  
 230 InfoPro [53] and DGL [6] from Table 2 in [53]. TRGL largely outperforms the other methods. It  
 231 also outperforms end-to-end training in all but one case (that with 16 modules). With a batch size of  
 232 64, memory savings of parallel TRGL compared to end-to-end training reach 48% and 58.5% with 8  
 233 and 16 modules respectively, with comparable test accuracy. With 4 modules, TRGL training weighs  
 234 24% less than end-to-end-training, and has a test accuracy that is better by 2 percentage points (see  
 235 Section 4.2 and Table 5 for a detailed memory usage comparison with InfoPro).

Table 3: Test accuracy of Parallel (Par) TRGL with  $K$  modules (average and 95% confidence interval over 5 runs) using a ResNet-110 on STL10, compared to DGL, two variants of InfoPro and E2E from Table 2 in [53].

| $K$ | Par VanGL        | Par TRGL (ours)         | DGL              | InfoPro S        | InfoPro C        | E2E              |
|-----|------------------|-------------------------|------------------|------------------|------------------|------------------|
| 2   | 79.85 $\pm$ 0.93 | <b>80.04</b> $\pm$ 0.85 | 75.03 $\pm$ 1.18 | 78.98 $\pm$ 0.51 | 79.01 $\pm$ 0.64 | 77.73 $\pm$ 1.61 |
| 4   | 77.11 $\pm$ 2.31 | <b>79.72</b> $\pm$ 0.81 | 73.23 $\pm$ 0.64 | 78.72 $\pm$ 0.27 | 77.27 $\pm$ 0.40 | 77.73 $\pm$ 1.61 |
| 8   | 75.71 $\pm$ 0.55 | <b>77.82</b> $\pm$ 0.73 | 72.67 $\pm$ 0.24 | 76.40 $\pm$ 0.49 | 74.85 $\pm$ 0.52 | 77.73 $\pm$ 1.61 |
| 16  | 73.57 $\pm$ 0.95 | <b>77.22</b> $\pm$ 1.20 | 72.27 $\pm$ 0.58 | 73.95 $\pm$ 0.71 | 73.73 $\pm$ 0.48 | 77.73 $\pm$ 1.61 |

236 The fourth experiment is training (from scratch) in parallel a Swin-Tiny Transformer [32] divided  
 237 into 4 modules on three datasets. We compare in Table 4 our results with those of InfoPro [53] and  
 238 InfoProL, a variant of InfoPro proposed in [39]. TRGL outperforms the other module-wise training  
 239 methods. It does not outperform end-to-end training in this case, but consumes 29% less memory  
 240 on CIFAR10 and CIFAR100 and 50% less on STL10, compared to 38% for InfoPro and 45% for  
 241 InfoProL in [39].

Table 4: Test accuracy of parallel TRGL with 4 modules (average and 95% confidence interval over 5 runs) on a Swin-Tiny Transformer, compared to InfoPro, InfoProL and E2E from Table 3 in [39], with memory saved compared to E2E as a percentage of E2E memory consumption in red.

| Dataset  | Parallel VanGL                       | Parallel TRGL (ours)                        | InfoPro                   | InfoProL                  | E2E          |
|----------|--------------------------------------|---------------------------------------------|---------------------------|---------------------------|--------------|
| STL10    | 67.00 $\pm$ 1.36 ( $\downarrow$ 55%) | 67.92 $\pm$ 1.12 ( $\downarrow$ 50%)        | 64.61 ( $\downarrow$ 38%) | 66.89 ( $\downarrow$ 45%) | <b>72.19</b> |
| CIFAR10  | 83.94 $\pm$ 0.42 ( $\downarrow$ 33%) | 86.48 $\pm$ 0.54 ( $\downarrow$ 29%)        | 83.38 ( $\downarrow$ 38%) | 86.28 ( $\downarrow$ 45%) | <b>91.37</b> |
| CIFAR100 | 69.34 $\pm$ 0.91 ( $\downarrow$ 33%) | <u>74.11</u> $\pm$ 0.31 ( $\downarrow$ 29%) | 68.36 ( $\downarrow$ 38%) | 73.00 ( $\downarrow$ 45%) | <b>75.03</b> |

## 242 4.2 Memory savings

243 As seen above, parallel TRGL is lighter than end-to-end training by up to almost 60%. The extra  
 244 memory consumed by our regularization compared to parallel VanGL is between 2 and 13% of  
 245 end-to-end memory. Memory savings depend then mainly on the size of the auxiliary classifier,  
 246 which can easily be adjusted. Note that delayed gradients method DDG and FR increase memory  
 247 usage [25], and Sedona does not claim to save memory, but rather to speed up training [40]. DGL is  
 248 architecture-wise essentially identical to VanGL and consumes the same memory.

249 We compare in Table 5 the memory consumption of our method to that of InfoPro [53] on a ResNet-  
 250 110 on STL10 with a batch size of 64 (the same setting as in Table 3). InfoPro [53] also propose  
 251 to split the network into modules that have the same weight but not necessarily the same number  
 252 of layers. They only implement this for  $K \leq 4$  modules. When the modules are even in weight and  
 253 not in depth, we call the training methods VanGL\*, TRGL\* and InfoPro\*. In practice, this leads  
 254 to shallower early modules which slightly hurts performance according to [40], and as seen below.  
 255 However, TRGL\* still outperforms InfoPro and end-to-end training, and it leads to even bigger  
 256 memory savings. We see in Table 5 that TRGL saves more memory than InfoPro in two out of three  
 257 cases (4 and 8 modules), and about the same in the third case (16 modules), with much better test  
 258 accuracy in all cases. Likewise, TRGL\* is lighter than InfoPro\*, with better accuracy. However,  
 259 parallel module-wise training does slightly slow down training. Epoch time increases by 6% with 2  
 260 modules and by 16% with 16 modules. TRGL is only slower than VanGL by 2% for for all number of  
 261 modules due to the additional regularization term. This is comparable to InfoPro which report a time  
 262 overhead between 1 and 27% compared to end-to-end training. See Appendix F for more details.

Table 5: Memory savings using a ResNet-110 on STL10 split into  $K$  modules trained in parallel with a batch size of 64, as a percentage of the weight of end-to-end training. Average test accuracy over 5 runs is between brackets. Test accuracy of end-to-end training is 77.73%.

| $K$ | Equally deep modules |                      |             | Equally heavy modules |                      |             |
|-----|----------------------|----------------------|-------------|-----------------------|----------------------|-------------|
|     | Par VanGL            | Par TRGL (ours)      | InfoPro     | Par VanGL*            | Par TRGL* (ours)     | InfoPro*    |
| 4   | 27% (77.11)          | 24% ( <b>79.72</b> ) | 18% (78.72) | 41% (77.14)           | 39% ( <b>78.94</b> ) | 33% (78.78) |
| 8   | 50% (75.71)          | 48% ( <b>77.82</b> ) | 37% (76.40) |                       |                      |             |
| 16  | 61% (73.57)          | 58% ( <b>77.22</b> ) | 59% (73.95) |                       |                      |             |

### 263 4.3 Sequential full block-wise training

264 Block-wise sequential training, meaning that each module is a single residual block and that the  
 265 blocks are trained sequentially, therefore requiring only enough memory to train one block and its  
 266 classifier. Even though it has been less explored in recent module-wise training methods, it has been  
 267 used in practice in very constrained settings such as on-device training [51, 50]. We then test our  
 268 regularization in this section in this setting, with more details in Appendix G. We propose here to use  
 269 shallower ResNets that are initially wider. These architectures are well-adapted to layer-wise training  
 270 as seen in [5]. We check first in Table 9 in Appendix G that this architecture works well with parallel  
 271 module-wise training with 2 modules by comparing it favorably on CIFAR10 [30] with methods  
 272 DGL [6], InfoPro [53] and DDG [26] that use a ResNet-110 with the same number of parameters.  
 273 We then train a 10-block ResNet block-wise on CIFAR100. In Tables 10 and 11 in Appendix G, we  
 274 see that MLS training improves the accuracy of sequential training by 0.8 percentage points when the  
 275 trainset is full, but works less well on small train sets. Of the two, the regularization mainly improves  
 276 the test accuracy of MLS training. The improvement increases as the training set gets smaller and  
 277 reaches 1 percentage point. While parallel module-wise training performs quite close to end-to-end  
 278 training in the full data regime and much better in the small data regime, sequential and multi-lap  
 279 sequential training are competitive with end-to-end training in the small data regime. Combining the  
 280 multi-lap trick and the regularization improves the accuracy of sequential training by 1.2 percentage  
 281 points when using the entire trainset. We report further results for full block-wise training on MNIST  
 282 [31] and CIFAR10 [30] in Tables 12 and 13 in Appendix G. The 88% accuracy of sequential training  
 283 on CIFAR10 in Table 12 is the same as in Table 2 of [5], which is the best method for layer-wise  
 284 sequential training available, with VGG networks of comparable depth and width.

285 We verify that our method avoids the accuracy collapse. In Figure 2, we show the accuracy of  
 286 each module with and without the regularization. On the left, from parallel module-wise training  
 287 experiments from Table 3, TRGL performs worse than vanilla greedy learning early, but surpasses it in  
 288 later modules, indicating that it does avoid early overfitting. On the right, from sequential block-wise  
 289 training experiments from Table 12, we see a large decline in performance that the regularization  
 290 avoids. We see similar patterns in Figure 3 in Appendix G with parallel and MLS block-wise training.

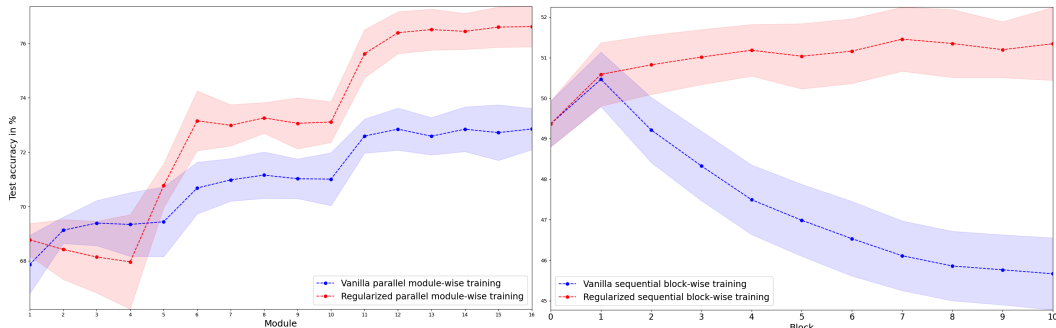

Figure 2: Test accuracy after each module averaged over 10 runs with 95% confidence intervals. Left: parallel vanilla (VanGL, in blue) and regularized (TRGL, in red) module-wise training of a ResNet-110 with 16 modules on STL10 (Table 3). Right: sequential vanilla (VanGL, in blue) and regularized (TRGL, in red) block-wise training of a 10-block ResNet on 2% of CIFAR10 (Table 12).



## 291 5 Limitations

292 The results in Appendix G show a few limitations of our method, as the improvements from the  
293 regularization are sometimes minimal on sequential training. However, the results show that our  
294 approach works in all settings (parallel and sequential with many or few modules), whereas other  
295 papers don't test their methods in all settings, and some show problems in other settings than the  
296 original one in subsequent papers (e.g. delayed gradients methods when the number of modules  
297 increases [25] and PredSim in [40]). Also, for parallel training in Section 4.1, the improvement from  
298 the regularization compared to VanGL is larger and increases with the number of modules (so with  
299 the memory savings) and reaches almost 5 percentage points. We show in Appendix H that our  
300 method is not very sensitive to the choice of hyperparameter  $\tau$  over a large scale.

## 301 6 Related work

302 Layer-wise training was initially been considered as a pre-training and initialization method [8, 36]  
303 and was shown recently to be competitive with end-to-end training [5, 38]. Many papers consider  
304 using a different auxiliary loss, instead of or in addition to the classification loss: kernel similarity [35],  
305 information-theory-inspired losses [46, 37, 34, 53] and biologically plausible losses [46, 38, 20, 9, 56].  
306 Methods [5], PredSim [38], DGL [6], Sedona [40] and InfoPro [53] report the best module-wise  
307 training results. [5, 6] do it simply through the architecture choice of the auxiliary networks. Sedona  
308 applies architecture search to decide on where to split the network into modules and what auxiliary  
309 classifier to use before module-wise training. Only BoostResNet [24] also proposes a block-wise  
310 training idea geared for ResNets. However, their results only show better early performance and  
311 end-to-end fine-tuning is required to be competitive. A method called ResIST [15] that is similar  
312 to block-wise training of ResNets randomly assigns ResBlocks to one of up to 16 modules that  
313 are trained independently and reassembled before another random partition. More of a distributed  
314 training method, it is only compared with local SGD [47]. These methods can all be combined with  
315 our regularization, and we do use the auxiliary classifier from [5, 6].

316 Besides module-wise training, methods such as DNI [27, 11], DDG [26] and FR [25], solve the  
317 update and backward locking problems with an eye towards parallelization by using delayed or  
318 predicted gradients, or even predicted inputs to address forward locking, which is what [48] do. But  
319 they observe training issues with more than 5 modules [25]. This makes them compare unfavorably  
320 to module-wise training [6]. The high dimension of the predicted gradient which scales with the  
321 size of the network renders [27, 11] challenging in practice. Therefore, despite its simplicity, greedy  
322 module-wise training is more appealing when working in a constrained setting.

323 Viewing ResNets as dynamic transport systems [13, 29] followed from their view as a discretization  
324 of ODEs [54]. Transport regularization of ResNets in particular is motivated by the observation that  
325 they are naturally biased towards minimally modifying their input [28, 21]. We further linked this  
326 transport viewpoint with gradient flows in the Wasserstein space to apply it in a principled way to  
327 module-wise training. Gradient flows on the data distribution appeared recently in deep learning.  
328 In [1], the focus is on functionals of measures whose first variations are known in closed form and  
329 used, through their gradients, in the algorithm. This limits the scope of their applications to transfer  
330 learning and similar tasks. Likewise, [17, 33, 4, 3] use the explicit gradient flow of  $f$ -divergences  
331 and other distances between measures for generation and generator refinement. In contrast, we use  
332 the discrete minimizing movement scheme which does not require computation of the first variation  
333 and allows to consider classification.

## 334 7 Conclusion

335 We introduced a transport regularization for module-wise training that theoretically links module-wise  
336 training to gradient flows of the loss in probability space. Our method provably leads to more regular  
337 modules and experimentally improves the test accuracy of module-wise parallel, sequential and  
338 multi-lap sequential (a variant of sequential training that we introduce) training. Through this simple  
339 method that does not complexify the architecture, we make module-wise training competitive with  
340 end-to-end training while benefiting from its lower memory usage. Being a regularization, the method  
341 can easily be combined with other layer-wise training methods. Future work can experiment with  
342 working in Wasserstein space  $W_p$  for  $p \neq 2$ , i.e. regularizing with a norm  $\|\cdot\|_p$  with  $p \neq 2$ .

343 **References**

- 344 [1] ALVAREZ-MELIS, D., AND FUSI, N. Dataset dynamics via gradient flows in probability space.  
345 *ICML* (2021).
- 346 [2] AMBROSIO, L., GIGLI, N., AND SAVARE, G. *Gradient Flows in Metric Spaces and in the*  
347 *Space of Probability Measures*. Birkhäuser Basel, 2005.
- 348 [3] ANSARI, A. F., ANG, M. L., AND SOH, H. Refining deep generative models via discriminator  
349 gradient flow. In *ICLR* (2021).
- 350 [4] ARBEL, M., KORBA, A., SALIM, A., AND GRETTON, A. Maximum mean discrepancy  
351 gradient flow. In *NeurIPS* (2019).
- 352 [5] BELILOVSKY, E., EICKENBERG, M., AND OYALLON, E. Greedy layerwise learning can scale  
353 to imagenet. In *ICML* (2019).
- 354 [6] BELILOVSKY, E., EICKENBERG, M., AND OYALLON, E. Decoupled greedy learning of cnns.  
355 In *ICML* (2020).
- 356 [7] BENAMOU, J., AND BRENIER, Y. A computational fluid mechanics solution to the monge-  
357 kantorovich mass transfer problem. *Numerische Mathematik* (2000).
- 358 [8] BENGIO, Y., LAMBLIN, P., POPOVICI, D., AND LAROCHELLE, H. Greedy layer-wise training  
359 of deep networks. In *NeurIPS* (2006).
- 360 [9] BERND ILLING, WULFRAM GERSTNER, G. B. Towards truly local gradients with clapp:  
361 Contrastive, local and predictive plasticity. *arXiv* (2020).
- 362 [10] COATE, A., LEE, H., AND NG, A. Y. An analysis of single layer networks in unsupervised  
363 feature learning. In *AISTATS* (2011).
- 364 [11] CZARNECKI, W. M., ŚWIRSZCZ, G., JADERBERG, M., OSINDERO, S., VINYALS, O., AND  
365 KAVUKCUOGLU, K. Understanding synthetic gradients and decoupled neural interfaces. In  
366 *ICML* (2017).
- 367 [12] DE, S., AND SMITH, S. L. Batch normalization biases residual blocks towards the identity  
368 function in deep networks. In *NeurIPS* (2020).
- 369 [13] DE BÉZENAC, E., AYED, I., AND GALLINARI, P. Optimal unsupervised domain translation.  
370 *arXiv* (2019).
- 371 [14] DOSOVITSKIY, A., BEYER, L., KOLESNIKOV, A., WEISSENBORN, D., ZHAI, X., UN-  
372 TERTHINER, T., DEGHANI, M., MINDERER, M., HEIGOLD, G., GELLY, S., USZKOREIT,  
373 J., AND HOULSBY, N. An image is worth 16x16 words: Transformers for image recognition at  
374 scale. In *International Conference on Learning Representations* (2021).
- 375 [15] DUN, C., WOLFE, C. R., JERMAINE, C. M., AND KYRILLIDIS, A. Resist: Layer-wise  
376 decomposition of resnets for distributed training. *arXiv* (2021).
- 377 [16] FIGALLI, A. *The Monge-Ampere Equation and Its Applications*. Zurich lectures in advanced  
378 mathematics. European Mathematical Society, 2017.
- 379 [17] GAO, Y., JIAO, Y., WANG, Y., WANG, Y., YANG, C., AND ZHANG, S. Deep generative  
380 learning via variational gradient flow. In *ICML* (2019).
- 381 [18] GIANAZZA, U., GOBBINO, M., AND SAVARÈ, G. Evolution problems and minimizing  
382 movements. *Atti della Accademia Nazionale dei Lincei. Classe di Scienze Fisiche, Matematiche*  
383 *e Naturali. Rendiconti Lincei. Matematica e Applicazioni* 5 (1994), 289–296.
- 384 [19] GIORGI, E. D., MARINO, A., AND TOSQUES, M. Problemi di evoluzione in spazi metrici  
385 e curve di massima pendenza. *Atti della Accademia Nazionale dei Lincei. Classe di Scienze*  
386 *Fisiche, Matematiche e Naturali. Rendiconti* 68, 3 (3 1980), 180–187.
- 387 [20] GUPTA, S. K. A more biologically plausible local learning rule for anns. *arXiv* (2020).
- 388 [21] HAUSER, M. On residual networks learning a perturbation from identity. *arXiv* (2019).
- 389 [22] HE, K., ZHAN, X., REN, S., AND SUN, J. Identity mappings in deep residual networks. In  
390 *ECCV* (2016).
- 391 [23] HE, K., ZHANG, X., REN, S., AND SUN, J. Deep residual learning for image recognition. In  
392 *CVPR* (2016).

- 393 [24] HUANG, F., ASH, J., LANGFORD, J., AND SCHAPIRE, R. Learning deep resnet blocks  
394 sequentially using boosting theory. In *ICML* (2018).
- 395 [25] HUO, Z., GU, B., AND HUANG, H. Training neural networks using features replay. In *NeurIPS*  
396 (2018).
- 397 [26] HUO, Z., GU, B., YANG, Q., AND HUANG, H. Decoupled parallel backpropagation with  
398 convergence guarantee. In *ICML* (2018).
- 399 [27] JADERBERG, M., CZARNECKI, W. M., OSINDERO, S., VINYALS, O., GRAVES, A., SILVER,  
400 D., AND KAVUKCUOGLU, K. Decoupled neural interfaces using synthetic gradients. In *ICML*  
401 (2017).
- 402 [28] JASTRZEBSKI, S., ET AL. Residual connections encourage iterative inference. In *ICLR* (2018).
- 403 [29] KARKAR, S., AYED, I., DE BÉZENAC, E., AND GALLINARI, P. A principle of least action for  
404 the training of neural networks. In *ECML-PKDD* (2020).
- 405 [30] KRIZHEVSKY, A. Learning multiple layers of features from tiny images. *University of Toronto*  
406 *Technical Report* (2009).
- 407 [31] LECUN, Y., CORTES, C., AND BURGES, C. J. MNIST handwritten digit database.  
408 [yann.lecun.com/exdb/mnist](http://yann.lecun.com/exdb/mnist) (2010).
- 409 [32] LIU, Z., LIN, Y., CAO, Y., HU, H., WEI, Y., ZHANG, Z., LIN, S., AND GUO, B. Swin  
410 transformer: Hierarchical vision transformer using shifted windows. In *Proceedings of the*  
411 *IEEE/CVF International Conference on Computer Vision (ICCV)* (2021).
- 412 [33] LIUTKUS, A., IMŞEKLI, U., MAJEWSKI, S., DURMUS, A., AND STOTER, F.-R. Sliced-  
413 wasserstein flows: Nonparametric generative modeling via optimal transport and diffusions. In  
414 *ICML* (2019).
- 415 [34] MA, W.-D. K., LEWIS, J., AND KLEIJN, W. B. The hsic bottleneck: Deep learning without  
416 back-propagation. In *AAAI* (2020).
- 417 [35] MANDAR KULKARNI, S. K. Layer-wise training of deep networks using kernel similarity. In  
418 *DLPR workshop, ICPR* (2016).
- 419 [36] MARQUEZ, E. S., HARE, J. S., AND NIRANJAN, M. Deep cascade learning. *IEEE Transactions*  
420 *on Neural Networks and Learning Systems* (2018).
- 421 [37] NGUYEN, T. T., AND CHOI, J. Layer-wise learning of stochastic neural networks with  
422 information bottleneck. *Entropy* 21 (2019).
- 423 [38] NØKLAND, A., AND EIDNES, L. H. Training neural networks with local error signals. In  
424 *ICML* (2019).
- 425 [39] PATHAK, P., ZHANG, J., AND SAMARAS, D. Local learning on transformers via feature  
426 reconstruction, 2022.
- 427 [40] PYEON, M., MOON, J., HAHN, T., AND KIM, G. Sedona: Search for decoupled neural  
428 networks toward greedy block-wise learning. In *ICLR* (2021).
- 429 [41] SANDLER, M., HOWARD, A. G., ZHU, M., ZHMOGINOV, A., AND CHEN, L. Mobilenetv2:  
430 Inverted residuals and linear bottlenecks. In *2018 IEEE Conference on Computer Vision and*  
431 *Pattern Recognition, CVPR 2018, Salt Lake City, UT, USA, June 18-22, 2018* (2018), Computer  
432 Vision Foundation / IEEE Computer Society, pp. 4510–4520.
- 433 [42] SANTAMBROGIO, F. *Optimal Transport for Applied Mathematicians*. Birkhäuser, 2015.
- 434 [43] SANTAMBROGIO, F. Euclidean, metric, and wasserstein gradient flows: an overview. *arXiv*  
435 (2016).
- 436 [44] SAXE, A. M., MCCLELLAND, J. L., AND GANGULI, S. Exact solutions to the nonlinear  
437 dynamics of learning in deep linear neural network. In *ICLR* (2014).
- 438 [45] SIMONYAN, K., AND ZISSERMAN, A. Very deep convolutional networks for large-scale image  
439 recognition. In *International Conference on Learning Representations (ICLR 2014)* (2014).
- 440 [46] SINDY LÖWE, PETER O’CONNOR, B. V. Putting an end to end-to-end: Gradient-isolated  
441 learning of representations. In *NeurIPS* (2019).
- 442 [47] STICH, S. U. Local sgd converges fast and communicates little. In *ICLR* (2019).

- 443 [48] SUN, Q., DONG, H., CHEN, Z., SUN, J., LI, Z., AND DONG, B. Layer-parallel training of  
444 residual networks with auxiliary-variable networks. *arXiv* (2021).
- 445 [49] TAN, M., AND LE, Q. EfficientNet: Rethinking model scaling for convolutional neural  
446 networks. In *Proceedings of the 36th International Conference on Machine Learning* (09–  
447 15 Jun 2019), K. Chaudhuri and R. Salakhutdinov, Eds., vol. 97 of *Proceedings of Machine*  
448 *Learning Research*, PMLR, pp. 6105–6114.
- 449 [50] TANG, Y., TENG, Q., ZHANG, L., MIN, F., AND HE, J. Layer-wise training convolutional  
450 neural networks with smaller filters for human activity recognition using wearable sensors.  
451 *IEEE Sensors Journal* (2021).
- 452 [51] TENG, Q., WANG, K., ZHANG, L., AND HE, J. The layer-wise training convolutional neural  
453 networks using local loss for sensor-based human activity recognition. *IEEE Sensors Journal*  
454 (2020).
- 455 [52] VILLANI, C. *Optimal Transport: Old and New*. Springer-Verlag, 2008.
- 456 [53] WANG, Y., NI, Z., SONG, S., AND LE YANG, G. H. Revisiting locally supervised learning:  
457 an alternative to end-to-end training. In *ICLR* (2021).
- 458 [54] WEINAN, E. A proposal on machine learning via dynamical systems. *Commun. Math. Stat*  
459 (2017).
- 460 [55] XIE, S., ET AL. Aggregated residual transformations for deep neural networks. In *CVPR*  
461 (2017).
- 462 [56] YUWEN XIONG, MENGYE REN, R. U. Loco: Local contrastive representation learning. In  
463 *NeurIPS* (2020).
- 464 [57] ZAGORUYKO, S., AND KOMODAKIS, N. Wide residual networks. In *BMVC* (2016).
- 465 [58] ZHANG, J., ET AL. Towards robust resnet: A small step but a giant leap. In *IJCAI* (2019).
- 466 [59] ZHANG, J., ZHANG, X., MA, K., GUPTA, R., SALTZ, J., VAKALOPOULOU, M., AND  
467 SAMARAS, D. Gigapixel whole-slide images classification using locally supervised learning. In  
468 *Medical Image Computing and Computer Assisted Intervention – MICCAI 2022* (Cham, 2022),  
469 Springer Nature Switzerland, pp. 192–201.

## 470 A Background on optimal transport

471 The Wasserstein space  $\mathbb{W}_2(\Omega)$  with  $\Omega$  a convex and compact subset of  $\mathbb{R}^d$  is the space  $\mathcal{P}(\Omega)$  of  
 472 probability measures over  $\Omega$ , equipped with the distance  $W_2$  given by the solution to the optimal  
 473 transport problem

$$W_2^2(\alpha, \beta) = \min_{\gamma \in \Pi(\alpha, \beta)} \int_{\Omega \times \Omega} \|x - y\|^2 d\gamma(x, y) \quad (12)$$

474 where  $\Pi(\alpha, \beta)$  is the set of probability distribution over  $\Omega \times \Omega$  with first marginal  $\alpha$  and second  
 475 marginal  $\beta$ , i.e.  $\Pi(\alpha, \beta) = \{\gamma \in \mathcal{P}(\Omega \times \Omega) \mid \pi_{1\#}\gamma = \alpha, \pi_{2\#}\gamma = \beta\}$  where  $\pi_1(x, y) = x$  and  
 476  $\pi_2(x, y) = y$ . The optimal transport problem can be seen as looking for a transportation plan  
 477 minimizing the cost of displacing some distribution of mass from one configuration to another. This  
 478 problem indeed has a solution in our setting and  $W_2$  can be shown to be a geodesic distance (see  
 479 for example [42, 52]). If  $\alpha$  is absolutely continuous and  $\partial\Omega$  is  $\alpha$ -negligible then the problem in (12)  
 480 (called the Kantorovich problem) has a unique solution and is equivalent to the Monge problem, i.e.

$$W_2^2(\alpha, \beta) = \min_{T \text{ s.t. } T_{\#}\alpha = \beta} \int_{\Omega} \|T(x) - x\|^2 d\alpha(x) \quad (13)$$

481 and this problem has a unique solution  $T^*$  linked to the solution  $\gamma^*$  of (12) through  $\gamma^* = (\text{id}, T^*)_{\#}\alpha$ .  
 482 Another equivalent formulation of the optimal transport problem in this setting is the dynamical  
 483 formulation [7]. Here, instead of directly pushing samples of  $\alpha$  to  $\beta$  using  $T$ , we can equivalently  
 484 displace mass, according to a continuous flow with velocity  $v_t : \mathbb{R}^d \rightarrow \mathbb{R}^d$ . This implies that the  
 485 density  $\alpha_t$  at time  $t$  satisfies the *continuity equation*  $\partial_t \alpha_t + \nabla \cdot (\alpha_t v_t) = 0$ , assuming that initial and  
 486 final conditions are given by  $\alpha_0 = \alpha$  and  $\alpha_1 = \beta$  respectively. In this case, the optimal displacement  
 487 is the one that minimizes the total action caused by  $v$  :

$$W_2^2(\alpha, \beta) = \min_v \int_0^1 \|v_t\|_{L^2(\alpha_t)}^2 dt \quad (14)$$

s.t.  $\partial_t \alpha_t + \nabla \cdot (\alpha_t v_t) = 0, \alpha_0 = \alpha, \alpha_1 = \beta$

488 Instead of describing the density's evolution through the continuity equation, we can describe the  
 489 paths  $\phi_t^x$  taken by particles at position  $x$  from  $\alpha$  when displaced along the flow  $v$ . Here  $\phi_t^x$  is the  
 490 position at time  $t$  of the particle that was at  $x \sim \alpha$  at time 0. The continuity equation is then equivalent  
 491 to  $\partial_t \phi_t^x = v_t(\phi_t^x)$ . See chapters 4 and 5 of [42] for details. Rewriting the conditions as necessary,  
 492 Problem (14) becomes

$$W_2^2(\alpha, \beta) = \min_v \int_0^1 \|v_t\|_{L^2((\phi_t)_{\#}\alpha)}^2 dt \quad (15)$$

s.t.  $\partial_t \phi_t^x = v_t(\phi_t^x), \phi_0 = \text{id}, (\phi_1)_{\#}\alpha = \beta$

493 and the optimal transport map  $T^*$  that solves (13) is in fact  $T^*(x) = \phi_1^x$  for  $\phi$  that solves the  
 494 continuity equation together with the optimal  $v^*$  from (15). We refer to [42, 52] for these results on  
 495 optimal transport.

496 Optimal transport maps have some regularity properties under some boundedness assumptions. We  
 497 mention the following result from [16]:

498 **Theorem A.1.** *Let  $\alpha$  and  $\beta$  be absolutely continuous measures on  $\mathbb{R}^d$  and  $T$  the optimal transport*  
 499 *map between  $\alpha$  and  $\beta$  for the Euclidean cost. Suppose there are bounded open sets  $X$  and  $Y$ , such*  
 500 *that the density of  $\alpha$  (respectively of  $\beta$ ) is null on  $X^c$  (respectively  $Y^c$ ) and bounded away from zero*  
 501 *and infinity on  $X$  (respectively  $Y$ ).*

*Then there exists two relatively closed sets of null measure  $A \subset X$  and  $B \subset Y$ , such that  $T$  is*  
 *$\eta$ -Hölder continuous from  $X \setminus A$  to  $Y \setminus B$ , i.e.  $\forall x, y \in X \setminus A$  we have*

$$\|T(x) - T(y)\| \leq C \|x - y\|^\eta \text{ for constants } \eta, C > 0$$

## 502 B Background on gradient flows

503 We follow [43, 2] for this background on gradient flows. Given a function  $\mathcal{L} : \mathbb{R}^d \rightarrow \mathbb{R}$  and an initial  
 504 point  $x_0 \in \mathbb{R}^d$ , a *gradient flow* is a curve  $x : [0, \infty[ \rightarrow \mathbb{R}^d$  that solves the Cauchy problem

$$\begin{cases} x'(t) = -\nabla \mathcal{L}(x(t)) \\ x(0) = x_0 \end{cases} \quad (16)$$

505 A solution exists and is unique if  $\nabla\mathcal{L}$  is Lipschitz or  $\mathcal{L}$  is convex. Given  $\tau > 0$  and  $x_0^\tau = x_0$  define a  
 506 sequence  $(x_k^\tau)_k$  through the *minimizing movement scheme*:

$$x_{k+1}^\tau \in \arg \min_{x \in \mathbb{R}^d} \mathcal{L}(x) + \frac{1}{2\tau} \|x - x_k^\tau\|^2 \quad (17)$$

507  $\mathcal{L}$  lower semi-continuous and  $\mathcal{L}(x) \geq C_1 - C_2\|x\|^2$  guarantees existence of a solution of (17) for  
 508  $\tau$  small enough.  $\mathcal{L}$   $\lambda$ -convex meets these conditions and also provides uniqueness of the solution  
 509 because of strict convexity of the target. See [42, 43, 2].

510 We interpret the point  $x_k^\tau$  as the value of a curve  $x$  at time  $k\tau$ . We can then construct a curve  $x^\tau$  as  
 511 the piecewise constant interpolation of the points  $x_k^\tau$ . We can also construct a curve  $\tilde{x}^\tau$  as the affine  
 512 interpolation of the points  $x_k^\tau$ .

513 If  $\mathcal{L}(x_0) < \infty$  and  $\inf \mathcal{L} > -\infty$  then  $(x^\tau)$  and  $(\tilde{x}^\tau)$  converge uniformly to the same curve  $x$  as  $\tau$   
 514 goes to zero (up to extracting a subsequence). If  $\mathcal{L}$  is  $\mathcal{C}^1$ , then the limit curve  $x$  is a solution of (16)  
 515 (i.e. a gradient flow of  $\mathcal{L}$ ). If  $\mathcal{L}$  is not differentiable then  $x$  is solution of the problem defined using  
 516 the subdifferential of  $\mathcal{L}$ , i.e.  $x$  satisfies  $x'(t) \in -\partial\mathcal{L}(x(t))$  for almost every  $t$ .

517 If  $\mathcal{L}$  is  $\lambda$ -convex with  $\lambda > 0$ , then the solution to (16) converges exponentially to the unique minimizer  
 518 of  $\mathcal{L}$  (which exists by coercivity). So taking  $\tau \rightarrow 0$  and  $k \rightarrow \infty$ , we tend towards the minimizer of  $\mathcal{L}$ .

519 The advantage of the minimizing movement scheme (17) is that it can be adapted to metric spaces  
 520 by replacing the Euclidean distance by the metric space's distance. In the (geodesic) metric space  
 521  $\mathbb{W}_2(\Omega)$  with  $\Omega$  convex and compact, for  $\mathcal{L} : \mathbb{W}_2(\Omega) \rightarrow \mathbb{R} \cup \{\infty\}$  lower semi-continuous for the weak  
 522 convergence of measures in duality with  $\mathcal{C}(\Omega)$  (equivalent to lower semi-continuous with respect to  
 523 the distance  $W_2$ ) and  $\rho_0^\tau = \rho_0 \in \mathcal{P}(\Omega)$ , the minimizing movement scheme (17) becomes

$$\rho_{k+1}^\tau \in \arg \min_{\rho \in \mathcal{P}(\Omega)} \mathcal{L}(\rho) + \frac{1}{2\tau} W_2^2(\rho, \rho_k^\tau) \quad (18)$$

524 This problem has a solution because the objective is lower semi-continuous and the minimization is  
 525 over  $\mathcal{P}(\Omega)$  which is compact by Banach-Alaoglu.

526 We can construct a piecewise constant interpolation between the measures  $\rho_k^\tau$ , or a geodesic inter-  
 527 polation where we travel along a geodesic between  $\rho_k^\tau$  and  $\rho_{k+1}^\tau$  in  $\mathbb{W}_2(\Omega)$ , constructed using the  
 528 optimal transport map between these measures. Again, if  $\mathcal{L}(x_0) < \infty$  and  $\inf \mathcal{L} > -\infty$  then both  
 529 interpolations converge uniformly to a limit curve  $\tilde{\rho}$  as  $\tau$  goes to zero. Under further conditions on  $\mathcal{L}$ ,  
 530 mainly  $\lambda$ -geodesic convexity (i.e.  $\lambda$ -convexity along geodesics) for  $\lambda > 0$ , we can prove stability and  
 531 convergence of  $\tilde{\rho}(t)$  to a minimizer of  $\mathcal{L}$  as  $t \rightarrow \infty$ , see [42, 43, 2].

### 532 C Proof of Proposition 2.3

533 *Proof.* Take a minimizing sequence  $(\tilde{F}_i, \tilde{T}_i)$ , i.e. such that  $\mathcal{C}(\tilde{F}_i, \tilde{T}_i) \rightarrow \min \mathcal{C}$ , where  $\mathcal{C} \geq 0$  is the  
 534 target function in (3) and denote  $\beta_i = \tilde{T}_i \# \rho_k^\tau$ . Then by compactity  $\tilde{F}_i \rightarrow F^*$  and  $\beta_i \rightarrow \beta^*$  in duality  
 535 with  $\mathcal{C}_b(\Omega)$  by Banach-Alaoglu. There exists  $T^*$  an optimal transport map between  $\rho_k^\tau$  and  $\beta^*$ . Then  
 536  $\mathcal{C}(F^*, T^*) \leq \lim \mathcal{C}(\tilde{F}_i, \tilde{T}_i) = \min \mathcal{C}$  by continuity of  $\mathcal{L}$  and because

$$\begin{aligned} \int_{\Omega} \|T^*(x) - x\|^2 d\rho_k^\tau(x) &= W_2^2(\rho_k^\tau, \beta^*) \\ &= \lim W_2^2(\rho_k^\tau, \beta_i) \\ &\leq \lim \int_{\Omega} \|\tilde{T}_i(x) - x\|^2 d\rho_k^\tau(x) \end{aligned}$$

537 as  $W_2$  metrizes weak convergence of measures. We take  $(F_k^\tau, T_k^\tau) = (F^*, T^*)$ . It is also immediate  
 538 that for any minimizing pair, the transport map has to be optimal. Taking a minimizing sequence  
 539  $(\tilde{F}_i, \tilde{v}^i)$  and the corresponding induced maps  $\tilde{T}_i$  we get the same result for Problem (11). Problems  
 540 (3) and (11) are equivalent by the equivalence between Problems (13) and (15).  $\square$

### 541 D Varying the regularization weight

542 The discussion in Section 2.2 suggests taking a fixed weight  $\tau$  for the transport cost that is as small as  
 543 possible. However, instead of using a fixed  $\tau$ , we might want to vary it along the depth  $k$  to further

544 constrain with a smaller  $\tau_k$  the earlier modules to avoid that they overfit or the later modules to  
 545 maintain the accuracy of earlier modules. We might also want to regularize the network further in  
 546 earlier epochs when the data is more entangled. To unify and formalize this varying weight  $\tau_{k,i}$  across  
 547 modules  $k$  and SGD iterations  $i$ , we use a scheme inspired by the method of multipliers to solve  
 548 Problems (2) and (10). To simplify the notations, we will instead consider the weight  $\lambda_{k,i} := 2\tau_{k,i}$   
 549 given to the loss. We denote  $\theta_{k,i}$  the parameters of both  $T_k$  and  $F_k$  at SGD iteration  $i$ . We also denote  
 550  $L(\theta, x)$  and  $W(\theta, x)$  respectively the loss and the transport regularization as functions of parameters  
 551  $\theta$  and data point  $x$ . We now increase the weight  $\lambda_{k,i}$  of the loss every  $s$  iterations of SGD by a value  
 552 that is proportional to the current loss. Given increase factor  $h > 0$ , initial parameters  $\theta_{k,1}$ , initial  
 553 weights  $\lambda_{k,1} \geq 0$ , learning rates ( $\eta_i$ ) and batches ( $x_i$ ), we apply for module  $k$  and  $i \geq 1$ :

$$\begin{cases} \theta_{k,i+1} &= \theta_{k,i} - \eta_i \nabla_{\theta} (\lambda_{k,i} L(\theta_{k,i}, x_i) + W(\theta_{k,i}, x_i)) \\ \lambda_{k,i+1} &= \lambda_{k,i} + hL(\theta_{k,i+1}, x_{i+1}) \text{ if } i \bmod s = 0 \text{ else } \lambda_{k,i} \end{cases}$$

554 The weights  $\lambda_{k,i}$  will vary along modules  $k$  because they will evolve differently with iterations  $i$   
 555 for each  $k$ . They will increase more slowly with  $i$  for larger  $k$  because deeper modules will have  
 556 smaller loss. This method can be seen as a method of multipliers for the problem of minimizing  
 557 the transport under the constraint of zero loss. Therefore it is immediate by slightly adapting the  
 558 proof of Proposition 2.3 or from [29] that we are still solving a problem that admits a solution  
 559 whose non-auxiliary part is an optimal transport map with the same regularity as stated above. We  
 560 use the same initial value  $\lambda_1 = \lambda_{k,1}$  for all modules so that this method requires choosing three  
 561 hyper-parameters ( $h$ ,  $s$  and  $\lambda_1$ ). In practice (see Section 4.1 and Appendix E), it works best in only  
 562 one experiment. Simply manually finding a value of  $\tau$  that is multiplied by 2 for the second half of  
 563 the network works best in all the other experiments.

## 564 E Implementation details

565 We use standard data augmentation and standard implementations for VGG-19, ResNet-50, ResNet-  
 566 101, ResNet-110, ResNet-152 and Swin-Tiny Transformer (the same as for the other methods in  
 567 Section 4.1). We use NVIDIA Tesla V100 16GB GPUs for the experiments. Training a Resnet-152  
 568 on TinyImageNet in Table 1 takes about 36 hours. Training a Resnet-152 on CIFAR100 in Table 1  
 569 takes about 11 hours. Training a ResNet-110 on STL10 in Table 3 takes about 3 hours. Training a  
 570 Swin-Tiny Transformer in Table 4 take between 40 minutes and 1 hour.

571 For sequential and multi-lap sequential training, we use SGD with a learning rate of 0.007. With the  
 572 exception of the Swin Transformer in Table 4, we use SGD for parallel training with learning rate of  
 573 0.003 in all Tables but Table 3 where the learning rate is 0.002. For the Swin Transformer in Table 4,  
 574 we use the AdamW optimizer with a learning rate of 0.007 and a CosineLR scheduler.

575 For end-to-end training we use a learning rate of 0.1 that is divided by five at epochs 120, 160 and  
 576 200. Momentum is always 0.9. For parallel and end-to-end training, we train for 300 epochs. For  
 577 sequential and multi-lap sequential training, the number of epochs varies per module (see Section G).

578 For experiments in Section 4.1, we use a batch size of 256, orthogonal initialization [44] with a gain  
 579 of 0.1, label smoothing of 0.1 and weight decay of 0.0002. The batch size changes to 64 for Table 3  
 580 and to 1024 for Table 4.

581 For experiments in Section 4.3, we use a batch size of 128, orthogonal initialization with a gain of  
 582 0.05, no label smoothing and weight decay of 0.0001.

583 In Table 1, we use  $\tau = 500000$  for the first two modules and then double it for the last two modules  
 584 for TRGL. In Table 2, we use  $\lambda_{k,1} = 1$ ,  $h = 1$  and  $s = 50$  for TRGL. In Table 3, we use  $\tau = 0.5$  and  
 585 double it at the midpoint, expect for the first line where  $\tau = 50$ .

## 586 F Memory savings

587 We compare in Table 6 the memory consumption of our method to that of InfoPro [53] on a ResNet-  
 588 110 split into  $K$  modules trained in parallel on STL10 with a batch size of 64 (so the same setting as  
 589 in Table 3 in Section 4.1). We report in Table 6 the memory saved as a percentage of the 6230 MiB  
 590 memory required by end-to-end training with the same batch size. VanGL refers to our architecture  
 591 trained without the regularization. InfoPro [53] also propose to split the network into  $K$  modules that

592 have the same weight but not necessarily the same number of layers. They only implement this for  
 593  $K \leq 4$  modules. When the modules are even in weight and not in depth, we call the training methods  
 594 VanGL\*, TRGL\* and InfoPro\*. In practice, this leads to shallower early modules which slightly  
 595 hurts performance according to [40]. We verify this in Table 7 (to be compared with Table 3 in  
 596 Section 4.1). However, TRGL\* still outperforms InfoPro and end-to-end training, and it leads to even  
 597 bigger memory savings. We see in Table 6 that TRGL saves more memory than InfoPro in two out of  
 598 three cases (4 and 8 modules), and about the same in the third case (16 modules), with much better  
 599 test accuracy in all cases. Likewise, TRGL\* is lighter than InfoPro\*, with better accuracy. We also  
 600 see that the added memory cost of the regularization compared to vanilla greedy learning is small.  
 601 However, parallel module-wise training does slightly slow down training. Epoch time increases by  
 602 6% with 2 modules and by 16% with 16 modules. TRGL is only slower than VanGL by 2% for for  
 603 all number of modules due to the additional regularization term. This is comparable to InfoPro which  
 604 report a time overhead between 1 and 27% compared to end-to-end training.

Table 6: Memory savings using a ResNet-110 on STL10 split into  $K$  modules trained in parallel with a batch size of 64, as a percentage of the weight of end-to-end training. Average test accuracy over 5 runs is between brackets. Test accuracy of end-to-end training is 77.73%.

| $K$ | Equally deep modules |                      |             | Equally heavy modules |                      |             |
|-----|----------------------|----------------------|-------------|-----------------------|----------------------|-------------|
|     | Par VanGL            | Par TRGL (ours)      | InfoPro     | Par VanGL*            | Par TRGL* (ours)     | InfoPro*    |
| 4   | 27% (77.11)          | 24% ( <b>79.72</b> ) | 18% (78.72) | 41% (77.14)           | 39% ( <b>78.94</b> ) | 33% (78.78) |
| 8   | 50% (75.71)          | 48% ( <b>77.82</b> ) | 37% (76.40) |                       |                      |             |
| 16  | 61% (73.57)          | 58% ( <b>77.22</b> ) | 59% (73.95) |                       |                      |             |

Table 7: Test accuracy of parallel (Par) TRGL\* with  $K$  modules (average and 95% confidence interval over 5 runs) on a ResNet-110 trained on STL10, compared to InfoPro\* and E2E training from Table 3 in [53]

| $K$ | Par VanGL*       | Par TRGL* (ours)        | InfoPro*         |
|-----|------------------|-------------------------|------------------|
| 2   | 79.05 $\pm$ 1.33 | <b>79.47</b> $\pm$ 1.36 | 79.05 $\pm$ 0.57 |
| 4   | 77.14 $\pm$ 1.23 | <b>78.94</b> $\pm$ 1.13 | 78.78 $\pm$ 0.72 |

605 Note that methods DDG [26] and FR [25], being delayed gradient methods and not module-wise  
 606 training methods, do not save memory (they actually increase memory usage, see FR [25]). Sedona  
 607 [40] also does not claim to save memory, as their first module (the heaviest) is deeper than the others,  
 608 but rather to speed up computation. Finally, DGL [6] is architecture-wise essentially identical to  
 609 VanGL and consumes the same memory.

## 610 G Sequential full block-wise training

611 To show that our method works well with all types of module-wise training when using few modules,  
 612 we train a ResNet-101 split in 2 modules on CIFAR100, sequentially and multi-lap sequentially.  
 613 Results are in Table 8. We see that our idea of multi-lap sequential training adds one percentage point  
 614 of accuracy to sequential training, and that the regularization further improves the accuracy by about  
 615 half a percentage point. As only one module has to be trained at a time, these two training methods  
 616 require only around half the memory end-to-end training requires (the size of the heaviest module  
 617 and its classifier more exactly).

Table 8: Test accuracy of sequential (Seq) and multi-lap sequential (MLS) TRGL and VanGL with 2 modules on CIFAR100 using ResNet-101 (average of 2 runs).

| Seq VanGL | Seq TRGL | MLS VanGL | MLS TRGL     |
|-----------|----------|-----------|--------------|
| 73.31     | 73.61    | 74.34     | <b>74.78</b> |



618 We now focus on full block-wise training, meaning that each module is a single ResBlock, mostly  
619 sequentially. We propose here to use shallower and initially wider ResNets with a downsampling and  
620 256 filters initially and a further downsampling and doubling of the number of filters at the midpoint,  
621 no matter the depth. In these ResNets, we use the ResBlock from [22] with two convolutional layers.  
622 If such a network is divided in  $K$  modules of  $M$  ResBlocks each, we call the network a  $K-M$   
623 ResNet. These wider shallower architectures are well-adapted to layer-wise training as seen in [5].  
624 We check in Table 9 that this architecture works well with parallel module-wise training by comparing  
625 favorably on CIFAR10 ([30]) a 2-7 ResNet with DGL, InfoPro ([53]) and DDG [26]. The 2-7 ResNet  
626 has 45 millions parameters, which is about the same as the ResNet-110 divided in two used by the  
627 other methods, and performs better when trained in parallel.

Table 9: Average test accuracy and 95% confidence interval of 2-7 ResNet over 10 runs on CIFAR10 with parallel TRGL and VanGL, compared to DGL and DDG from [6] and InfoPro from [53] that split a ResNet-110 in 2 module-wise-parallel-trained modules.

| Parallel VanGL (ours) | Parallel TRGL (ours)   | DGL   | DDG   | InfoPro |
|-----------------------|------------------------|-------|-------|---------|
| 94.01 $\pm$ .17       | <b>94.05</b> $\pm$ .18 | 93.50 | 93.41 | 93.58   |

628 We now train a 10-block ResNet block-wise on CIFAR100 (a 10-1 ResNet in our notations). We  
629 report even the small improvements in accuracy to show that our method works in all settings (parallel  
630 or sequential with many or few splits), which other methods don’t do. For sequential training, block  
631  $k$  is trained for  $50+10k$  epochs where  $0 \leq k \leq 10$ , block 0 being the encoder. This idea of increasing  
632 the number of epochs along with the depth is found in [36]. For MLS training, block  $k$  is trained  
633 for  $10+2k$  epochs, and this is repeated for 5 laps. In block-wise training, the last block does not  
634 always perform the best and we report the accuracy of the best block. In Table 10, we see that MLS  
635 training improves the test accuracy of sequential training by around 0.8 percentage points when the  
636 training dataset is full, but works less well on small training sets. Of the two, the regularization  
637 mainly improves the test accuracy of MLS training. The improvement increases as the training set  
638 gets smaller and reaches 1 percentage point. That is also the case for parallel module-wise training in  
639 Table 11, which already performs quite close to end-to-end training in the full data regime and much  
640 better in the small data regime. Combining the multi-lap trick and the regularization improves the  
641 performance of sequential training by 1.2 percentage points.

Table 10: Average highest test accuracy and 95% confidence interval of 10-1 ResNet over 10 runs on CIFAR100 with different train sizes and sequential (Seq), multi-lap sequential (MLS) and parallel (Par) TRGL and VanGL, compared to E2E.

| Train size | Seq VanGL        | Seq TRGL                | MLS VanGL        | MLS TRGL                | E2E              |
|------------|------------------|-------------------------|------------------|-------------------------|------------------|
| 50000      | 68.74 $\pm$ 0.45 | <b>68.79</b> $\pm$ 0.56 | 69.48 $\pm$ 0.53 | <b>69.95</b> $\pm$ 0.50 | 75.85 $\pm$ 0.70 |
| 25000      | 60.48 $\pm$ 0.15 | <b>60.59</b> $\pm$ 0.14 | 61.33 $\pm$ 0.23 | <b>61.71</b> $\pm$ 0.32 | 65.36 $\pm$ 0.31 |
| 12500      | 51.64 $\pm$ 0.33 | <b>51.74</b> $\pm$ 0.26 | 51.30 $\pm$ 0.22 | <b>51.89</b> $\pm$ 0.30 | 52.39 $\pm$ 0.97 |
| 5000       | 36.37 $\pm$ 0.33 | <b>36.40</b> $\pm$ 0.40 | 33.68 $\pm$ 0.48 | <b>34.61</b> $\pm$ 0.59 | 36.38 $\pm$ 0.31 |

Table 11: Average highest test accuracy and 95% confidence interval of 10-1 ResNet over 10 runs on CIFAR100 with different train sizes and sequential (Seq), multi-lap sequential (MLS) and parallel (Par) TRGL and VanGL, compared to E2E.

| Train size | Par VanGL        | Par TRGL                | E2E              |
|------------|------------------|-------------------------|------------------|
| 50000      | 72.59 $\pm$ 0.40 | <b>72.63</b> $\pm$ 0.40 | 75.85 $\pm$ 0.70 |
| 25000      | 64.84 $\pm$ 0.19 | <b>65.01</b> $\pm$ 0.27 | 65.36 $\pm$ 0.31 |
| 12500      | 55.13 $\pm$ 0.24 | <b>55.40</b> $\pm$ 0.35 | 52.39 $\pm$ 0.97 |
| 5000       | 39.45 $\pm$ 0.23 | <b>40.36</b> $\pm$ 0.23 | 36.38 $\pm$ 0.31 |

642 We report further results of block-wise training on CIFAR10 in Table 12 and on MNIST [31] in Table  
 643 13, but now we report the accuracy of the last block. We see again greater improvement due to the  
 644 regularization as the training set gets smaller, gaining up to 6 percentage points.

Table 12: Average last block test accuracy and 95% confidence interval of 10-1 ResNet over 10 runs on CIFAR10 with different train sizes and sequential TRGL and VanGL, compared to E2E.

| Train size | Seq VanGL   | Seq TRGL           | E2E         |
|------------|-------------|--------------------|-------------|
| 50000      | 88.02 ± .18 | <b>88.20</b> ± .24 | 91.88 ± .18 |
| 25000      | 83.95 ± .13 | <b>84.28</b> ± .22 | 88.75 ± .27 |
| 10000      | 76.00 ± .39 | <b>77.18</b> ± .34 | 82.61 ± .35 |
| 5000       | 67.74 ± .49 | <b>69.67</b> ± .44 | 73.93 ± .67 |
| 1000       | 45.67 ± .88 | <b>51.34</b> ± .90 | 50.63 ± .98 |

Table 13: Average last block test accuracy and 95% confidence interval of 20-1 ResNet (32 filters, fixed encoder, same classifier) over 20/50 runs on MNIST with different train sizes and parallel TRGL and VanGL, compared to E2E.

| Train size | Par VanGL    | Par TRGL           | E2E         |
|------------|--------------|--------------------|-------------|
| 60000      | 99.07 ± .04  | <b>99.08</b> ± .04 | 99.30 ± .03 |
| 30000      | 98.90 ± .05  | <b>98.93</b> ± .06 | 99.22 ± .03 |
| 12000      | 98.52 ± .06  | <b>98.59</b> ± .06 | 98.96 ± .06 |
| 6000       | 98.05 ± .09  | <b>98.16</b> ± .07 | 98.62 ± .06 |
| 1500       | 96.34 ± .12  | <b>96.91</b> ± .07 | 97.19 ± .08 |
| 1200       | 95.80 ± .12  | <b>96.58</b> ± .09 | 96.88 ± .09 |
| 600        | 91.35 ± .99  | <b>95.16</b> ± .15 | 95.30 ± .17 |
| 300        | 89.81 ± .73  | <b>92.86</b> ± .24 | 92.87 ± .28 |
| 150        | 81.84 ± 1.22 | <b>87.48</b> ± .42 | 87.82 ± .59 |

645 The 88% accuracy of sequential training on CIFAR10 in Table 12 is the same as for sequential  
 646 training in table 2 of [5], which is the best method for layer-wise sequential training available, with  
 647 VGG networks of comparable depth and width.

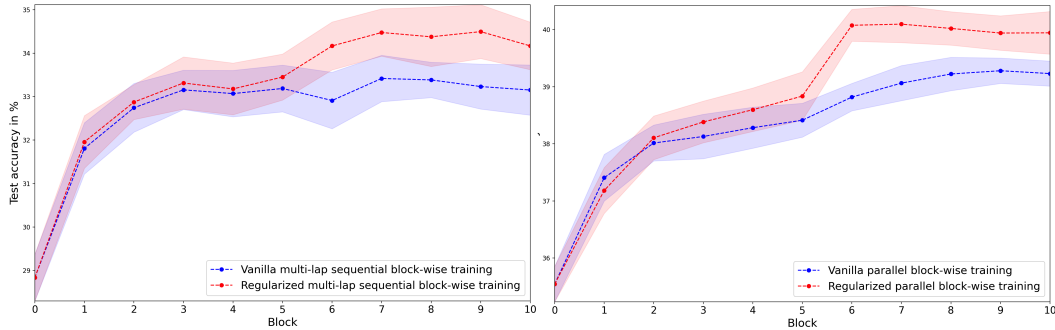

Figure 3: Test accuracy after each block of 10-1 ResNet averaged over 10 runs with 95% confidence intervals. Left: multi-lap sequential vanilla (VanGL, in blue) and regularized (TRGL, in red) block-wise training on 10% of the CIFAR100 training set. Right: parallel vanilla (VanGL, in blue) and regularized (TRGL, in red) block-wise training on 10% of CIFAR100 training set.

## 648 H Sensitivity to hyper-parameters

649 We show in Figure 4 below that TRGL still performs better than VanGL (in the same setting as in  
650 Table 3 in Section 4.1) for values of  $\tau$  from 0.03 to 100 and is still roughly equivalent to it for values  
651 up to 5000.

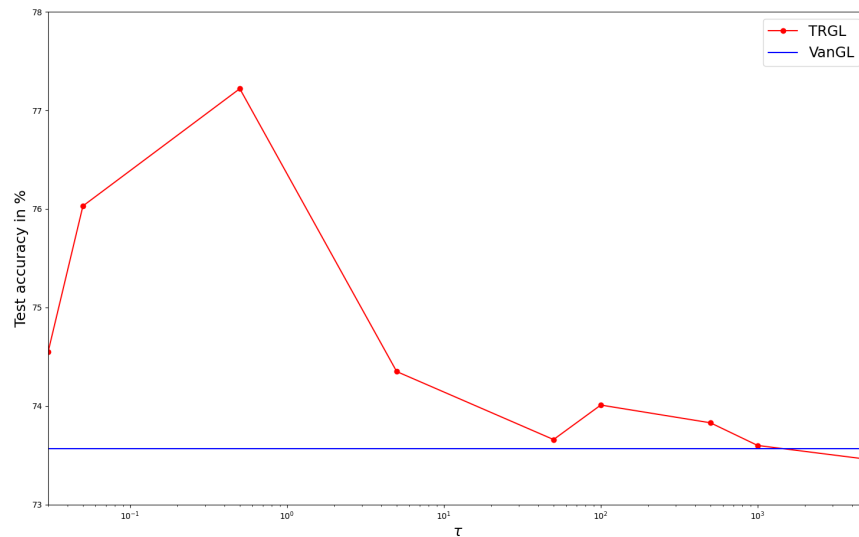

Figure 4: Average test accuracy over 5 runs of parallel TRGL using a ResNet110 on STL10 with 16 modules with different values of  $\tau$  (in red), and of VanGL (blue line).

## 652 I Broader impact

653 Less memory usage has a positive environmental impact and allows organizations with less resources  
654 to use deep learning.
